# Supplementary material
Source: Springer Nature journal article supplement (https://www.springermedizin.de/resource/supplementary/12879_2012_2206_MOESM2_ESM.pdf/9443620)

**A**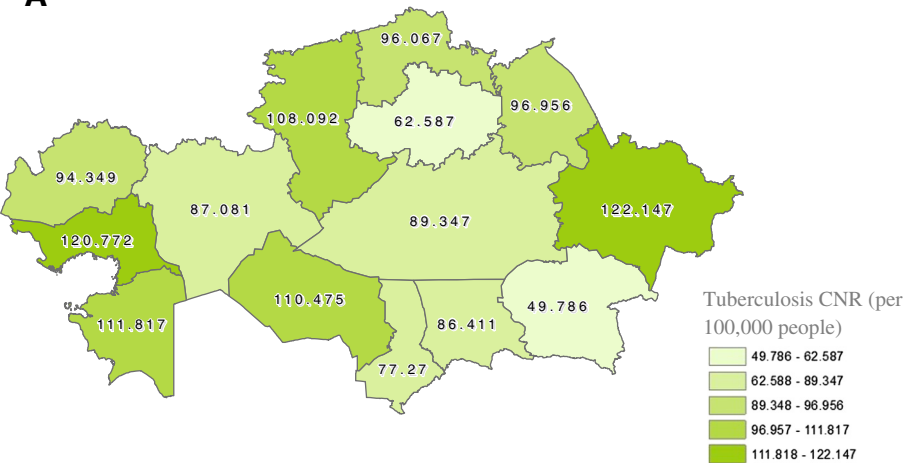**B**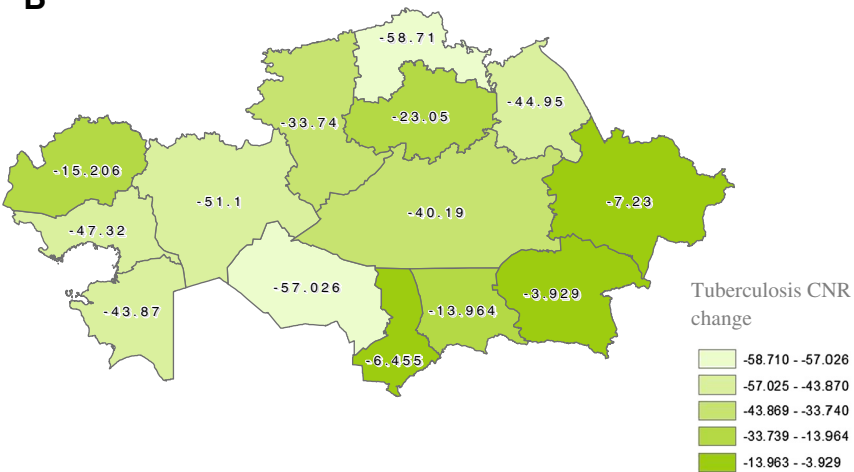

Supplement: MOESM2 [file 9443620]
